# Supplementary material
Source: Springer Nature journal article supplement (https://www.springermedizin.de/resource/supplementary/12916_2010_366_MOESM2_ESM.pdf/9599802)

# Time Asymmetry Index

6 months

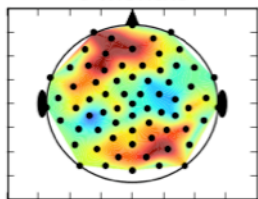

6 months

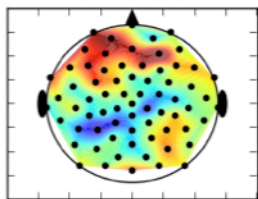

9 months

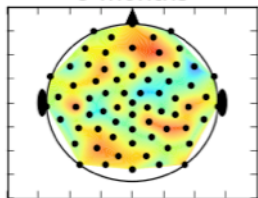

9 months

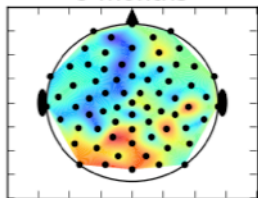

12 months

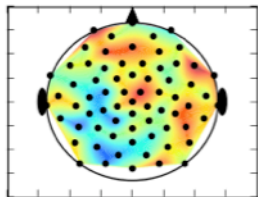

12 months

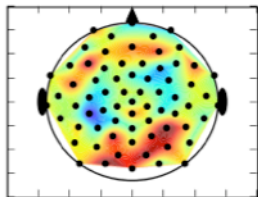

18 months

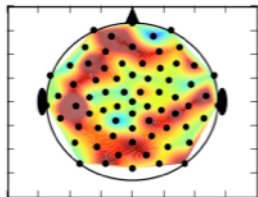

18 months

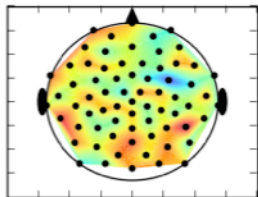

24 months

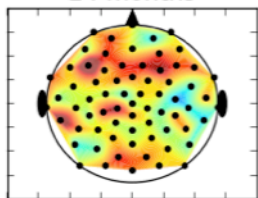

24 months

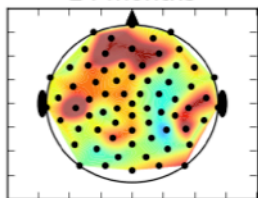

Normal

High risk ASD

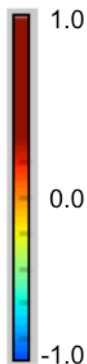

Supplement: MOESM2 [file 9599802]
